# Supplementary material
Source: bioRxiv or medRxiv preprint supplement (https://medrxiv.org/content/medrxiv/early/2024/06/12/2024.06.12.24308289/DC1/embed/media-1.pdf)

**UNIVERSITY OF SOUTH AFRICA  
Health Studies Higher Degrees Committee  
College of Human Sciences  
ETHICAL CLEARANCE CERTIFICATE**

**REC-012714-039**

**HS HDC/463/2015**

Date: 25 November 2015 Student No: 5766-094-8  
Project Title: Highly Active Antiretroviral Therapy among HIV positive women in Southern Ethiopia.  
Researcher: Alemayehu Abebe Demissie  
Degree: D Litt et Phil Code: DPCHS04  
Supervisor: Dr E Janse van Rensburg  
Qualification: D Cur  
Joint Supervisor: Prof D van der Wal

**DECISION OF COMMITTEE**

Approved

Conditionally Approved



**Prof L Roets  
CHAIRPERSON: HEALTH STUDIES HIGHER DEGREES COMMITTEE**



**Prof MM Moleki  
ACADEMIC CHAIRPERSON: DEPARTMENT OF HEALTH STUDIES**

PLEASE QUOTE THE PROJECT NUMBER IN ALL ENQUIRES

ሀዋሳ ዩኒቨርሲቲ  
ህክምናና ጤና ሳይንስ ኮሌጅ  
የምርምር ስነ-ምግባር ገምጋሚ  
ቦርድ

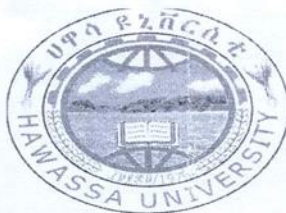

**HAWASSA UNIVERSITY**  
COLLEGE OF MEDICINE AND  
HEALTH SCIENCES  
Institutional Review Board

Ref. No: IRB/010/09

Date: 15/11/2016

Name of Researcher(s): *Alemayehu Abebe, Elsie Janse van Rensburg, DM van der Wal*

Topic of Proposal: *Highly Active Antiretroviral Therapy Adherence among HIV positive Women in Southern Ethiopia.*

Dear researcher(s),

The Institutional Review Board (IRB) at the College of Medicine and Health Sciences of Hawassa University has reviewed the aforementioned research protocol with special emphasis on the following points:

1. Are all principles considered?
  - 1.1. Respect for persons: Yes  No
  - 1.2. Beneficence: Yes  No
  - 1.3. Justice: Yes  No
2. Are the objectives of the study ethically achievable? Yes  No
3. Are the proposed research methods ethically sound? Yes  No

Based on the aforementioned ethical assessment, the IRB has:

- A. Approved the proposal for implementation
- B. Conditionally Approved
- C. Not Approved

Yours faithfully,

Ayalew Astatkie (PhD),  
Institutional Review Board Chairperson.

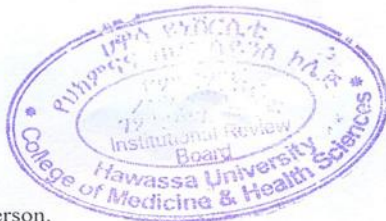

Supplement: Supplementary file [file media-1.pdf]
